# Supplementary material for: Meaningful standard of reference for appendiceal perforation: pathology, surgery, or both?
Source: PubMed Central journal article supplement — Ann Surg Treat Res. 2017 Jul 28;93(2):88–97. doi: 10.4174/astr.2017.93.2.88 (PMC5566752; doi:10.4174/astr.2017.93.2.88), 2017-07-28
Supplement: astr-93-88-s001.pdf [file astr-93-88-s001.pdf]

**Supplementary Table 1.** Investigating sites and site investigators

| Investigating site                                      | IRB approval No.     | Coinvestigators               |                    |
|---------------------------------------------------------|----------------------|-------------------------------|--------------------|
|                                                         |                      | Name                          | Department         |
| Daejin Medical Center, Bundang Jesaeng General Hospital | DR14-01              | Hyuk Jung Kim <sup>a)</sup>   | Radiology          |
|                                                         |                      | Young Rock Ha                 | Emergency Medicine |
|                                                         |                      | So Ya Paik                    | Pathology          |
|                                                         |                      | Ki Ho Kim                     | Surgery            |
| Myongji Hospital                                        | 14-009               | Noh Hyuck Park <sup>a)</sup>  | Radiology          |
|                                                         |                      | Mi Sung Kim <sup>b)</sup>     | Radiology          |
|                                                         |                      | Joohyun Suh                   | Emergency Medicine |
| Hanyang University Hospital                             | HYUH 2014-01-015-003 | Soon-Young Song <sup>a)</sup> | Radiology          |
| Hallym University Kangnam Sacred Heart Hospital         | 2014-02-18           | Tae Ho Lim                    | Emergency Medicine |
|                                                         |                      | Ji Young Woo <sup>a)</sup>    | Radiology          |
| Seoul National University Bundang Hospital              | B-1401/236-105       | Gu Hyun Kang                  | Emergency Medicine |
|                                                         |                      | Ji Hoon Park <sup>a)</sup>    | Radiology          |
|                                                         |                      | Bon Seung Gu                  | Radiology          |
|                                                         |                      | Sung-Bum Kang                 | Surgery            |
|                                                         |                      | Kyuseok Kim                   | Emergency Medicine |
|                                                         |                      | Yousun Ko                     | Radiology          |
|                                                         |                      | Hye Seung Lee                 | Pathology          |
|                                                         |                      | Kyoung Ho Lee                 | Radiology          |
|                                                         |                      | Seong Sook Hong <sup>a)</sup> | Radiology          |
|                                                         |                      | Young Shin Cho                | Emergency Medicine |
| Soonchunhyang University Seoul Hospital                 | 2014-01-010          | Kyung Yul Hur                 | Surgery            |
|                                                         |                      | Jiyoung Hwang                 | Radiology          |
|                                                         |                      | Jun Bum Park                  | Emergency Medicine |
|                                                         |                      | Hye Young Jang                | Emergency Medicine |
|                                                         |                      | Young Joo Lee                 | Emergency Medicine |
|                                                         |                      | Yoon Mi Jeon                  | Pathology          |
|                                                         |                      | Min Hee Lee <sup>a)</sup>     | Radiology          |
|                                                         |                      | Hee Kyung Kim                 | Pathology          |
|                                                         |                      | Ho Jung Kim                   | Emergency Medicine |
|                                                         |                      | Hae Kyung Lee                 | Radiology          |
| Samsung Medical Center                                  | 2014-01-120          | Eung Jin Shin                 | Surgery            |
|                                                         |                      | Boem Ha Yi                    | Radiology          |
|                                                         |                      | Hong Eo <sup>a)</sup>         | Radiology          |
|                                                         |                      | Won Chul Cha                  | Emergency Medicine |
| Korea University Guro Hospital                          | KUGH13268            | Ik Joon Jo                    | Emergency Medicine |
|                                                         |                      | Jongmee Lee <sup>a)</sup>     | Radiology          |
|                                                         |                      | Sung-Hyuk Choi                | Emergency Medicine |
|                                                         |                      | Chang Hee Lee                 | Radiology          |
| Hallym University Sacred Heart Hospital                 | 2014-I033            | Yang Shin Park                | Radiology          |
|                                                         |                      | Min-Jeong Kim <sup>a)</sup>   | Radiology          |
|                                                         |                      | Hong Il Ha                    | Radiology          |
|                                                         |                      | Dong Hoon Kim                 | Pathology          |
|                                                         |                      | Kwanseop Lee                  | Radiology          |
|                                                         |                      | Man Sup Lim                   | Surgery            |
|                                                         |                      | You Dong Sohn                 | Emergency Medicine |
| Korea University Ansan Hospital                         | AS13183              | Han Jin Cho <sup>a)</sup>     | Emergency Medicine |
|                                                         |                      | Suk Keu Yeom                  | Radiology          |

All hospitals were in metropolitan Seoul, Korea. All investigators provided study data and cared for the study patients.

IRB, Institutional Review Board.

<sup>a)</sup>Site principal investigators. <sup>b)</sup>Current affiliation: Sungkyunkwan University School of Medicine, Kangbuk Samsung Hospital.
