# Supplementary material for: Meaningful standard of reference for appendiceal perforation: pathology, surgery, or both?
Source: PubMed Central journal article supplement — Ann Surg Treat Res. 2017 Jul 28;93(2):88–97. doi: 10.4174/astr.2017.93.2.88 (PMC5566752; doi:10.4174/astr.2017.93.2.88), 2017-07-28
Supplement: astr-93-88-s002.pdf [file astr-93-88-s002.pdf]

**Supplementary Table 2.** PubMed search

| Query                                                                                                                                                          | Items found |
|----------------------------------------------------------------------------------------------------------------------------------------------------------------|-------------|
| (((appendicitis[MeSH Terms]) OR appendix[MeSH Terms]) OR appendectomy[MeSH Terms]) OR appendic*[Text Word]) OR appendix[Text Word]) OR appendectomy[Text Word] | 38,005      |
| AND                                                                                                                                                            |             |
| (((Intestinal perforation[MeSH Terms]) OR perforat*[Text Word]) OR rupture[Text Word]) OR complicat*[Text Word]) OR gangren*[Text Word]                        | 14,012      |
| AND                                                                                                                                                            |             |
| ("2012/01/01"[Date - Publication] : "2013/12/31"[Date - Publication])                                                                                          | 1,121       |
| AND                                                                                                                                                            |             |
| Human[Mesh Terms]                                                                                                                                              | 839         |
