# Supplementary material for: Meaningful standard of reference for appendiceal perforation: pathology, surgery, or both?
Source: PubMed Central journal article supplement — Ann Surg Treat Res. 2017 Jul 28;93(2):88–97. doi: 10.4174/astr.2017.93.2.88 (PMC5566752; doi:10.4174/astr.2017.93.2.88), 2017-07-28
Supplement: astr-93-88-s003.pdf [file astr-93-88-s003.pdf]

Supplementary Table 3. Articles addressing appendiceal perforation in 2012 and 2013

| Author                                | Appendiceal perforation rate <sup>a</sup>    | Reference standard for appendiceal perforation | Definition of Appendiceal Perforation             |                                                  |
|---------------------------------------|----------------------------------------------|------------------------------------------------|---------------------------------------------------|--------------------------------------------------|
|                                       |                                              |                                                | Surgical Findings                                 | Pathologic Findings                              |
| Anderson et al. <sup>b)</sup> [1]     | 29.7% (180,849/608,116)                      | Not clarified                                  | Not clarified                                     | Not clarified                                    |
| Andersson et al. <sup>b)</sup> [2]    | 20.6% (38,128/185,405)                       | Not clarified                                  | Not clarified                                     | Not clarified                                    |
| Blanco et al. [3]                     | 33.2% (106/319)                              | Not clarified                                  | Not clarified                                     | Not clarified                                    |
| Chao et al. <sup>b)</sup> [4]         | 23.1% (156/675)                              | Not clarified                                  | Not clarified                                     | Not clarified                                    |
| Deugarte et al. <sup>b)</sup> [5]     | 19.0% (555/2,919)                            | Not clarified                                  | Not clarified                                     | Not clarified                                    |
| Ein et al. [6]                        | NA (496/NA)                                  | Not clarified                                  | Not clarified                                     | Not clarified                                    |
| Le et al. <sup>b)</sup> [7]           | 35.1% (282 <sup>c)</sup> /804)               | Not clarified                                  | Not clarified                                     | Not clarified                                    |
| Lee et al. <sup>b)</sup> [8]          | 29.7% (202,865 <sup>d)</sup> /683,016)       | Not clarified                                  | Not clarified                                     | Not clarified                                    |
| Livingston et al. <sup>b)</sup> [9]   | 28.7% (154,468/537,670)                      | Not clarified                                  | Not clarified                                     | Not clarified                                    |
| Mason et al. <sup>b)</sup> [10]       | 20.6% (2,749 <sup>e)</sup> /13,330)          | Not clarified                                  | Not clarified                                     | Not clarified                                    |
| Massomi et al. <sup>b)</sup> [11]     | 27.4% (58,315/212,958)                       | Not clarified                                  | Not clarified                                     | Not clarified                                    |
| Massomi et al. <sup>b)</sup> [12]     | 49.9% (32,680/65,464)                        | Not clarified                                  | Not clarified                                     | Not clarified                                    |
| Naiditch et al. [13]                  | 30.8% (231/750)                              | Not clarified                                  | Not clarified                                     | Not clarified                                    |
| Papandria et al. <sup>b)</sup> [14]   | 30.3% (207,346 <sup>d)</sup> /683,590)       | Not clarified                                  | Not clarified                                     | Not clarified                                    |
| Ramos et al. <sup>b)</sup> [15]       | 43% (64/148)                                 | Not clarified                                  | Not clarified                                     | Not clarified                                    |
| Raval, et al. <sup>b)</sup> [16]      | 31.7% (2,976/9,377)                          | Not clarified                                  | Not clarified                                     | Not clarified                                    |
| Redan et al. [17]                     | 40.2% (379/943)                              | Not clarified                                  | Not clarified                                     | Not clarified                                    |
| Scarborough et al. <sup>b)</sup> [18] | 18.4% (10,027/54,467)                        | Not clarified                                  | Not clarified                                     | Not clarified                                    |
| Scarborough et al. <sup>b)</sup> [19] | 18.7% (7,335/39,122)                         | Not clarified                                  | Not clarified                                     | Not clarified                                    |
| Senekjian et al. <sup>b)</sup> [20]   | 16.2% (9,998 <sup>d)</sup> /61,830)          | Not clarified                                  | Not clarified                                     | Not clarified                                    |
| Thomas et al. [21]                    | NA (242/NA)                                  | Not clarified                                  | Not clarified                                     | Not clarified                                    |
| Trent et al. <sup>b)</sup> [22]       | 42.4% (203/479)                              | Not clarified                                  | Not clarified                                     | Not clarified                                    |
| Unknown <sup>b)</sup> [23]            | 16.3% (4,531/27,745)                         | Not clarified                                  | Not clarified                                     | Not clarified                                    |
| Unknown <sup>b)</sup> [24]            | 30.0% (21,015/70,075)                        | Not clarified                                  | Not clarified                                     | Not clarified                                    |
| Wei et al. <sup>b)</sup> [25]         | 25.8% (16,857/65,339)                        | Not clarified                                  | Not clarified                                     | Not clarified                                    |
| Worni et al. <sup>b)</sup> [26]       | 24.9% (37,740 <sup>f)</sup> /151,774)        | Not clarified                                  | Not clarified                                     | Not clarified                                    |
| Yaghoubian et al. [27]                | 24.5% (4,053/16,512)                         | Not clarified                                  | Not clarified                                     | Not clarified                                    |
| Fahmer et al. [28]                    | NA (114 <sup>g)</sup> /NA)                   | Not clarified                                  |                                                   | "Perforation" or peritonitis                     |
| Wu et al. [29]                        | 46% (52 <sup>h)</sup> /113)                  | Not clarified                                  |                                                   | "Perforation", gangrene, or phlegmon             |
| Wei et al. <sup>b)</sup> [30]         | 5.8% (53/908)                                | Not clarified                                  |                                                   | "Perforation", gangrene, abscess, or peritonitis |
| Blumfield et al. [31]                 | 36% (58/161)                                 | Surgical                                       | Not clarified                                     |                                                  |
| Graat et al. [32]                     | 23.9% (325/1,358)                            | Surgical                                       | Not clarified                                     |                                                  |
| Kharbanda et al. [33]                 | 27.0% (275/1,018)                            | Surgical                                       | Not clarified                                     |                                                  |
| Kong et al. [34]                      | 60.2% (301/500)                              | Surgical                                       | Not clarified                                     |                                                  |
| Ladd et al. [35]                      | 43.5% (290/667)                              | Surgical                                       | Not clarified                                     |                                                  |
| Leeuwenburgh et al. [36]              | 24.1% (60/249)                               | Surgical                                       | Not clarified                                     |                                                  |
| Levy et al. [37]                      | 36.9% (115/312)                              | Surgical                                       | Not clarified                                     |                                                  |
| Mizrahi et al. [38]                   | 13.2% (51/385)                               | Surgical                                       | Not clarified                                     |                                                  |
| Saito et al. [39]                     | 25.5% (100/392)                              | Surgical                                       | Not clarified                                     |                                                  |
| Schietroma et al. [40]                | NA (147/NA)                                  | Surgical                                       | Not clarified                                     |                                                  |
| Chiang et al. [41]                    | NA (70/NA)                                   | Surgical                                       | "Perforation"                                     |                                                  |
| Kong et al. [42]                      | 62% (114/185)                                | Surgical                                       | "Perforation"                                     |                                                  |
| Lacher et al. [43]                    | 21.0% (79/377)                               | Surgical                                       | "Perforation"                                     |                                                  |
| Khan et al. [44]                      | 25.4% (100 <sup>i)</sup> /393)               | Surgical                                       | "Perforation" or gangrene                         |                                                  |
| Broker et al. [45]                    | 21.1% (105/498)                              | Surgical                                       | "Perforation", abscess, or pus                    |                                                  |
| Hughes et al. [46]                    | 29.3% (78 <sup>j)</sup> /266)                | Surgical                                       | ("Perforation" or gangrene) and (spillage or pus) |                                                  |
| Galli et al. <sup>b)</sup> [47]       | 16.4% (169/1,032)                            | Surgical                                       | "Perforation" and (spillage or abscess)           |                                                  |
| Groves et al. <sup>b)</sup> [48]      | NA (289/NA)                                  | Surgical                                       | Spillage or abscess                               |                                                  |
| Hartwich et al. [49]                  | NA (237/NA)                                  | Surgical                                       | Wall defect or spillage <sup>d)</sup>             |                                                  |
| Knott et al. [50]                     | NA (410/NA)                                  | Surgical                                       | Wall defect or spillage <sup>d)</sup>             |                                                  |
| Safavi et al. [51]                    | 23.6% (57/242)                               | Surgical                                       | Wall defect or spillage <sup>d)</sup>             |                                                  |
| St Peter et al. [52]                  | NA (220/NA)                                  | Surgical                                       | Wall defect or spillage <sup>d)</sup>             |                                                  |
| Fallon et al. [53]                    | NA (50 <sup>g)</sup> /NA)                    | Surgical                                       | Wall defect, abscess, pus, or necrosis            |                                                  |
| Ali et al. [54]                       | 23.5% (295/1,257)                            | Pathologic                                     |                                                   | Not clarified                                    |
| Dennett et al. [55]                   | NA (108/NA)                                  | Pathologic                                     |                                                   | Not clarified                                    |
| Hung et al. [56]                      | 38.6% (88/228)                               | Pathologic                                     |                                                   | Not clarified                                    |
| Yannam et al. [57]                    | 29.4% (147/500)                              | Pathologic                                     |                                                   | Not clarified                                    |
| Yilmaz et al. [58]                    | 21.8% (243/1,117)                            | Pathologic                                     |                                                   | Not clarified                                    |
| Teixeira et al. [59]                  | 22.9% (942/4,108)                            | Pathologic                                     |                                                   | "Perforation"                                    |
| Wilson et al. [60]                    | 9.7% (50 <sup>g)</sup> /516)                 | Pathologic                                     |                                                   | "Perforation" or necrosis                        |
| Dimitriou et al. [61]                 | 37.1% (150 <sup>g)</sup> /404)               | Pathologic                                     |                                                   | "Perforation", abscess, or peritonitis           |
| Wei et al. [62]                       | 8.5% (155 <sup>g)</sup> /1,834)              | Pathologic                                     |                                                   | Gangrene                                         |
| McGowan et al. [63]                   | 12.1% (154/1,271)                            | Pathologic                                     |                                                   | Wall defect                                      |
| Naiditch et al. [64]                  | 32.1% (254/791)                              | Surgical or pathologic                         | Not clarified                                     | Not clarified                                    |
| Pooler et al. [65]                    | 17.8% (120/675)                              | Surgical or pathologic                         | Not clarified                                     | Not clarified                                    |
| Dhupar et al. [66]                    | 13.7% (59 <sup>g)</sup> /431)                | Surgical or pathologic                         | Not clarified                                     | "Perforation", gangrene, or abscess              |
| Bansal et al. [67]                    | 60.5% (170/281)                              | Surgical or pathologic                         | "Perforation"                                     | "Perforation"                                    |
| Tsai et al. <sup>b)</sup> [68]        | 58% (102/177)                                | Surgical or pathologic                         | "Perforation"                                     | "Perforation" and gangrene                       |
| Hansson et al. [69]                   | 22.8% (52/228)                               | Surgical or pathologic                         | "Perforation"                                     | "Perforation" and necrosis                       |
| Azok et al. [70]                      | 17.4% (65 <sup>g)</sup> /374 <sup>h)</sup> ) | Surgical or pathologic                         | "Perforation"                                     | "Perforation" or necrosis                        |
| Nomura et al. [71]                    | NA (50/NA)                                   | Surgical and pathologic                        | Not clarified                                     | Not clarified                                    |
| Akkoyun et al. [72]                   | NA (234/NA)                                  | Surgical and pathologic                        | "Perforation"                                     | "Perforation" but not microperforation           |
| Vahdad et al. [73]                    | NA (221/NA)                                  | Surgical and pathologic                        | "Perforation" or spillage <sup>d)</sup>           | "Perforation"                                    |
| Nataraja et al. [74]                  | NA (375 <sup>g)</sup> /NA)                   | Surgical and pathologic                        | Pus or phlegmon                                   | "Perforation" or necrosis                        |

NA, not available.

"Perforation" denotes "perforation" without further definition in the original text.

<sup>a)</sup>Data in parentheses are the number of patients with appendiceal perforation divided by the number of patients with confirmed appendicitis. <sup>b)</sup>Patient inclusion was based on the International Classification Disease code-9 or -10. <sup>c)</sup>Complicated appendicitis" was used instead of "perforated appendicitis" in the original text. <sup>d)</sup>Citing (reference number 75). <sup>e)</sup>Advanced appendicitis" was used instead of "perforated appendicitis" in the original text. <sup>f)</sup>Gangrenous appendicitis" was used instead of "perforated appendicitis" in the original text. <sup>g)</sup>Not including cases with computed tomography findings of perforation.
