# Supplementary material for: Meaningful standard of reference for appendiceal perforation: pathology, surgery, or both?
Source: PubMed Central journal article supplement — Ann Surg Treat Res. 2017 Jul 28;93(2):88–97. doi: 10.4174/astr.2017.93.2.88 (PMC5566752; doi:10.4174/astr.2017.93.2.88), 2017-07-28
Supplement: astr-93-88-s004.pdf [file astr-93-88-s004.pdf]

**Supplementary Table 4.** Use of laparoscopic appendectomy by site

| Investigating site | Overall           | Group 1           | Group 2      | Group 3         | Group 4      |
|--------------------|-------------------|-------------------|--------------|-----------------|--------------|
| Overall            | 67.9% (976/1,438) | 70.7% (766/1,083) | 73% (40/55)  | 52.5% (106/202) | 65% (64/98)  |
| Site 1             | 25.8% (112/434)   | 25.7% (73/284)    | 25% (4/16)   | 23% (22/97)     | 35% (13/37)  |
| Site 2             | 47% (88/189)      | 50% (85/170)      | 0% (0/1)     | 21% (3/14)      | 0% (0/4)     |
| Site 3             | 98% (161/165)     | 98% (134/137)     | 100% (7/7)   | 100% (13/13)    | 88% (7/8)    |
| Site 4             | 92% (141/154)     | 93% (116/125)     | NA (0/0)     | 81% (17/21)     | 100% (8/8)   |
| Site 5             | 96% (117/122)     | 98% (88/90)       | 80% (4/5)    | 85% (11/13)     | 100% (14/14) |
| Site 6             | 97% (110/113)     | 100% (80/80)      | 100% (15/15) | 100% (7/7)      | 73% (8/11)   |
| Site 7             | 96% (71/74)       | 98% (51/52)       | 100% (1/1)   | 94% (16/17)     | 75% (3/4)    |
| Site 8             | 95% (56/59)       | 98% (47/48)       | 50% (1/2)    | 75% (3/4)       | 100% (5/5)   |
| Site 9             | 96% (54/56)       | 98% (46/47)       | 100% (1/1)   | 83% (5/6)       | 100% (2/2)   |
| Site 10            | 98% (44/45)       | 100% (29/29)      | 100% (5/5)   | 88% (7/8)       | 100% (3/3)   |
| Site 11            | 82% (22/27)       | 81% (17/21)       | 100% (2/2)   | 100% (2/2)      | 50% (1/2)    |

Values are presented as % (number of patients).

NA, not available.

Group 1, nonperforation; group 2, perforation identified pathologically but not surgically; group 3, perforation identified surgically but not pathologically; group 4, perforation identified both pathologically and surgically.

Nine cases with open conversion after initial laparoscopic approach were counted as open appendectomies.
