# Supplementary material for: Meaningful standard of reference for appendiceal perforation: pathology, surgery, or both?
Source: PubMed Central journal article supplement — Ann Surg Treat Res. 2017 Jul 28;93(2):88–97. doi: 10.4174/astr.2017.93.2.88 (PMC5566752; doi:10.4174/astr.2017.93.2.88), 2017-07-28
Supplement: astr-93-88-s005.pdf [file astr-93-88-s005.pdf]

**Supplementary Table 5.** Use of laparoscopic appendectomy: results of univariable and multivariable analyses unadjusted for clustering effects by site

| Variable                                     | Univariate analysis |         | Multivariate analysis |         |
|----------------------------------------------|---------------------|---------|-----------------------|---------|
|                                              | OR (95% CI)         | P-value | AOR (95% CI)          | P-value |
| Age (yr)                                     |                     |         |                       |         |
| 15–24                                        | Reference           |         | Reference             |         |
| 25–34                                        | 1.2 (1.0–1.6)       | 0.11    | 1.4 (1.0–1.8)         | 0.04    |
| 35–44                                        | 1.0 (0.7–1.3)       | 0.91    | 1.0 (0.8–1.4)         | 0.79    |
| Sex                                          |                     |         |                       |         |
| Male                                         | 1.0 (0.8–1.3)       | 0.89    | 1.2 (0.9–1.5)         | 0.21    |
| Female                                       | Reference           |         | Reference             |         |
| Body mass index (kg/m <sup>2</sup> )         |                     |         |                       |         |
| Underweight (<18.5)                          | 1.2 (0.8–1.9)       | 0.35    | 1.2 (0.8–1.9)         | 0.36    |
| Normal (18.5–24.9)                           | Reference           |         | Reference             |         |
| Overweight or obesity (≥25.0)                | 1.0 (0.7–1.3)       | 0.81    | 0.9 (0.7–1.2)         | 0.38    |
| Missing <sup>a)</sup>                        | NA                  |         | NA                    |         |
| Time of presentation in emergency department |                     |         |                       |         |
| Working hours <sup>b)</sup>                  | 0.7 (0.5–0.9)       | 0.002   | 0.8 (0.6–1.0)         | 0.07    |
| After hours                                  | Reference           |         | Reference             |         |
| Time to appendectomy (hr) <sup>c)</sup>      |                     |         |                       |         |
| <6                                           | Reference           |         | Reference             |         |
| 6–12                                         | 1.2 (1.0–1.6)       | 0.10    | 1.2 (0.9–1.6)         | 0.14    |
| ≥12                                          | 2.2 (1.6–3.0)       | <0.001  | 2.2 (1.6–3.0)         | <0.001  |
| Perforation <sup>d)</sup>                    |                     |         |                       |         |
| Group 1                                      | Reference           |         | Reference             |         |
| Group 2                                      | 1.1 (0.6–2.0)       | 0.75    | 1.1 (0.6–2.1)         | 0.66    |
| Group 3                                      | 0.5 (0.3–0.6)       | <0.001  | 0.5 (0.3–0.6)         | <0.001  |
| Group 4                                      | 0.8 (0.5–1.2)       | 0.26    | 0.7 (0.5–1.2)         | 0.19    |

AOR, adjusted odds ratio; CI, confidence interval; OR, odds ratio.

Nine cases with open conversion from the initial laparoscopic approach were counted as open appendectomies.

<sup>a)</sup>Nine cases with missing data were not included in the multivariable analysis. <sup>b)</sup>8:00 AM to 5:00 PM on work days. <sup>c)</sup>Defined as the interval from the Emergency Department visit to the induction of anesthesia for appendectomy. <sup>d)</sup>Group 1, nonperforation; group 2, perforation identified pathologically but not surgically; group 3, perforation identified surgically but not pathologically; group 4, perforation identified both pathologically and surgically.
