# Supplementary material for: Meaningful standard of reference for appendiceal perforation: pathology, surgery, or both?
Source: PubMed Central journal article supplement — Ann Surg Treat Res. 2017 Jul 28;93(2):88–97. doi: 10.4174/astr.2017.93.2.88 (PMC5566752; doi:10.4174/astr.2017.93.2.88), 2017-07-28
Supplement: astr-93-88-s006.pdf [file astr-93-88-s006.pdf]

Supplementary Table 6. Length of hospital stay by site

| Investigating site    | Median day (interquartile range) |               |               |               |                | Prolonged Stay <sup>a)</sup> % (No. of patients) |                   |             |                 |             |
|-----------------------|----------------------------------|---------------|---------------|---------------|----------------|--------------------------------------------------|-------------------|-------------|-----------------|-------------|
|                       | Overall                          | Group 1       | Group 2       | Group 3       | Group 4        | Overall                                          | Group 1           | Group 2     | Group 3         | Group 4     |
| Overall <sup>b)</sup> | 3.1 (2.6–4.5)                    | 2.9 (2.5–3.7) | 3.0 (2.1–4.5) | 5.1 (3.8–6.6) | 6.0 (4.7–7.5)  | 35.9% (516/1,438)                                | 23.4% (253/1,083) | 35% (19/55) | 77.7% (157/202) | 89% (87/98) |
| Site 1                | 3.8 (3.0–5.5)                    | 3.5 (2.8–4.0) | 3.7 (3.0–4.8) | 5.6 (4.6–6.7) | 5.7 (4.8–7.1)  | 52.8% (229/434)                                  | 35.9% (102/284)   | 38% (6/16)  | 90% (87/97)     | 92% (34/37) |
| Site 2                | 3.0 (2.7–3.6)                    | 2.9 (2.6–3.2) | 6.9 (6.9–6.9) | 6.9 (5.8–7.1) | 6.9 (6.7–7.8)  | 24% (45/189)                                     | 16% (27/170)      | 100% (1/1)  | 93% (13/14)     | 100% (4/4)  |
| Site 3                | 2.0 (1.7–2.8)                    | 1.9 (1.7–2.6) | 2.7 (1.9–2.9) | 3.6 (2.0–5.9) | 5.4 (4.0–9.1)  | 12% (20/165)                                     | 4% (6/137)        | 14% (1/7)   | 38% (5/13)      | 100% (8/8)  |
| Site 4                | 3.1 (2.8–4.1)                    | 3.0 (2.8–3.9) | NA            | 3.9 (3.0–5.0) | 5.1 (4.7–7.1)  | 36% (56/154)                                     | 29% (36/125)      | NA (0/0)    | 62% (13/21)     | 88% (7/8)   |
| Site 5                | 2.9 (2.5–4.3)                    | 2.7 (2.2–3.5) | 4.3 (3.5–7.0) | 4.1 (2.9–8.3) | 5.9 (4.2–7.6)  | 34% (41/122)                                     | 20% (18/90)       | 80% (4/5)   | 62% (8/13)      | 79% (11/14) |
| Site 6                | 2.6 (1.8–3.9)                    | 2.5 (1.8–3.0) | 2.1 (1.2–4.1) | 5.7 (3.5–8.1) | 5.9 (3.9–7.7)  | 28% (32/113)                                     | 18% (14/80)       | 27% (4/15)  | 71% (5/7)       | 82% (9/11)  |
| Site 7                | 3.6 (2.7–4.8)                    | 3.1 (2.4–3.9) | 1.5 (1.5–1.5) | 4.8 (3.8–6.5) | 8.2 (5.8–11.3) | 42% (31/74)                                      | 27% (14/52)       | 0% (0/1)    | 76% (13/17)     | 100% (4/4)  |
| Site 8                | 2.9 (2.6–4.3)                    | 2.9 (2.5–3.7) | 2.4 (2.1–2.6) | 4.0 (1.9–6.5) | 4.8 (4.2–5.8)  | 29% (17/59)                                      | 23% (11/48)       | 0% (0/2)    | 50% (2/4)       | 80% (4/5)   |
| Site 9                | 3.2 (2.5–4.2)                    | 3.0 (2.3–3.9) | 1.0 (1.0–1.0) | 4.8 (4.0–5.2) | 4.0 (3.4–4.6)  | 32% (18/56)                                      | 26% (12/47)       | 0% (0/1)    | 83% (5/6)       | 50% (1/2)   |
| Site 10               | 3.7 (2.9–4.2)                    | 3.1 (2.8–3.9) | 3.7 (3.1–4.0) | 4.0 (3.7–4.9) | 9.0 (5.3–9.6)  | 42% (19/45)                                      | 31% (9/29)        | 40% (2/5)   | 63% (5/8)       | 100% (3/3)  |
| Site 11               | 2.8 (2.5–3.9)                    | 2.6 (2.4–3.0) | 5.2 (2.6–7.8) | 3.4 (2.8–4.0) | 7.3 (6.7–7.9)  | 30% (8/27)                                       | 19% (4/21)        | 50% (1/2)   | 50% (1/2)       | 100% (2/2)  |

NA, not available.

Group 1, nonperforation; group 2, perforation identified pathologically but not surgically; group 3, perforation identified surgically but not pathologically; group 4, perforation identified both pathologically and surgically.

<sup>a)</sup>Defined as 3.7 days (75th percentile in group 1) or longer. <sup>b)</sup>Unadjusted for clustering effects by site.
