# Supplementary material for: Meaningful standard of reference for appendiceal perforation: pathology, surgery, or both?
Source: PubMed Central journal article supplement — Ann Surg Treat Res. 2017 Jul 28;93(2):88–97. doi: 10.4174/astr.2017.93.2.88 (PMC5566752; doi:10.4174/astr.2017.93.2.88), 2017-07-28
Supplement: astr-93-88-s008.pdf [file astr-93-88-s008.pdf]

**REFERENCES**

1. Anderson JE, Bickler SW, Chang DC, Talamini MA. Examining a common disease with unknown etiology: trends in epidemiology and surgical management of appendicitis in California, 1995-2009. *World J Surg* 2012;36:2787-94.
2. Andersson RE. Short and long-term mortality after appendectomy in Sweden 1987 to 2006. Influence of appendectomy diagnosis, sex, age, co-morbidity, surgical method, hospital volume, and time period. A national population-based cohort study. *World J Surg* 2013;37:974-81.
3. Blanco FC, Sandler AD, Nadler EP. Increased incidence of perforated appendicitis in children with obesity. *Clin Pediatr (Phila)* 2012;51:928-32.
4. Chao PW, Ou SM, Chen YT, Lee YJ, Wang FM, Liu CJ, et al. Acute appendicitis in patients with end-stage renal disease. *J Gastrointest Surg* 2012;16:1940-6.
5. Deugarte DA, Stark R, Kaji AH, Yaghoubian A, Tolan A, Lee SL. Obesity does not impact outcomes for appendicitis. *Am Surg* 2012;78:254-7.
6. Ein SH, Nasr A, Ein A. Open appendectomy for pediatric ruptured appendicitis: a historical clinical review of the prophylaxis of wound infection and postoperative intra-abdominal abscess. *Can J Surg* 2013;56:E7-12.
7. Le J, Kurian J, Cohen HW, Weinberg G, Scheinfeld MH. Do clinical outcomes suffer during transition to an ultrasound-first paradigm for the evaluation of acute appendicitis in children? *Am J Roentgenol* 2013;201:1348-52.
8. Lee J, Tashjian DB, Moriarty KP. Missed opportunities in the treatment of pediatric appendicitis. *Pediatr Surg Int* 2012;28:697-701.
9. Livingston EH, Fairlie RW. Little effect of insurance status or socioeconomic condition on disparities in minority appendicitis perforation rates. *Arch Surg* 2012;147:11-7.
10. Mason RJ, Moazzez A, Moroney JR, Katkhouda N. Laparoscopic vs open appendectomy in obese patients: outcomes using the American College of Surgeons National Surgical Quality Improvement Program database. *J Am Coll Surg* 2012;215:88-99.
11. Masoomi H, Mills S, Dolich MO, Ketana N, Carmichael JC, Nguyen NT, et al. Comparison of outcomes of laparoscopic versus open appendectomy in children: data from the Nationwide Inpatient Sample (NIS), 2006-2008. *World J Surg* 2012;36:573-8.
12. Masoomi H, Mills S, Dolich MO, Ketana N, Carmichael JC, Nguyen NT, et al. Does laparoscopic appendectomy impart an advantage over open appendectomy in elderly patients? *World J Surg* 2012;36:1534-9.
13. Naiditch JA, Lautz TB, Raval MV, Madonna MB, Barsness KA. Effect of resident postgraduate year on outcomes after laparoscopic appendectomy for appendicitis in children. *J Laparoendosc Adv Surg Tech A* 2012;22:715-9.
14. Papandria D, Goldstein SD, Rhee D, Salazar JH, Arlikar J, Gorgy A, et al. Risk of perforation increases with delay in recognition and surgery for acute appendicitis. *J Surg Res* 2013;184:723-9.
15. Ramos CT, Nieves-Plaza M. The association of body mass index and perforation of the appendix in Puerto Rican children. *J Health Care Poor Underserved* 2012;23:376-85.
16. Raval MV, Deans KJ, Rangel SJ, Kelleher KJ, Moss RL. Factors associated with imaging modality choice in children with appendicitis. *J Surg Res* 2012;177:131-6.
17. Redan JA, Tempel MB, Harrison S, Zhu X. Vacation appendicitis. *JSLs* 2013;17:9-14.
18. Scarborough JE, Bennett KM, Pappas TN. Defining the impact of resident participation on outcomes after appendectomy. *Ann Surg* 2012;255:577-82.
19. Scarborough JE, Bennett KM, Pappas TN. Racial disparities in outcomes after appendectomy for acute appendicitis. *Am J Surg* 2012;204:11-7.
20. Senekjian L, Nirula R. Tailoring the operative approach for appendicitis to the patient: a prediction model from national surgical quality improvement program data. *J Am Coll Surg* 2013;216:34-40.
21. Thomas P, Knott EM, Sharp NE, St Peter SD. Implications of foley catheterization in children with perforated appendicitis. *J Surg Res* 2013;184:337-40.
22. Trent SA, Valley MA, Brookler K, Haukoos JS, Zerzan JT. Potential barriers associated with increased prevalence of perforated appendicitis in Colorado's pediatric Medicaid population. *Am J Emerg Med* 2013;31:469-72.
23. Appendicitis and appendectomies, active and reserve components, U.S. Armed Forces, 2002-2011. *MSMR* 2012;19:7-12.
24. Appendicitis and appendectomies among non-service member beneficiaries of the Military Health System, 2002-2011. *MSMR* 2012;19:13-6.
25. Wei PL, Liu SP, Keller JJ, Lin HC. Volume-outcome relation for acute appendicitis: evidence from a nationwide population-based study. *PLoS One* 2012;7:e52539.
26. Worni M, Ostbye T, Gandhi M, Rajgor D, Shah J, Shah A, et al. Laparoscopic appendectomy outcomes on the weekend and during the week are no different: a national study of 151,774 patients. *World J Surg* 2012;36:1527-33.
27. Yaghoubian A, Kaji AH, Lee SL. Laparoscopic versus open appendectomy: outcomes analysis. *Am Surg* 2012;78:1083-6.
28. Fahrner R, Schob O. Laparoscopic appendectomy as a teaching procedure: experiences with 1,197 patients in a community hospital. *Surg Today* 2012;42:1165-9.

29. Wu JY, Chen HC, Lee SH, Chan RC, Lee CC, Chang SS. Diagnostic role of procalcitonin in patients with suspected appendicitis. *World J Surg* 2012;36:1744-9.
30. Wei PL, Keller JJ, Liang HH, Lin HC. Acute appendicitis and adverse pregnancy outcomes: a nationwide population-based study. *J Gastrointest Surg* 2012;16:1204-11.
31. Blumfield E, Nayak G, Srinivasan R, Muranaka MT, Blitman NM, Blumfield A, et al. Ultrasound for differentiation between perforated and nonperforated appendicitis in pediatric patients. *Am J Roentgenol* 2013;200:957-62.
32. Graat LJ, Bosma E, Roukema JA, Heisterkamp J. Appendectomy by residents is safe and not associated with a higher incidence of complications: a retrospective cohort study. *Ann Surg* 2012;255:715-9.
33. Kharbanda AB, Dudley NC, Bajaj L, Stevenson MD, Macias CG, Mittal MK, et al. Validation and refinement of a prediction rule to identify children at low risk for acute appendicitis. *Arch Pediatr Adolesc Med* 2012;166:738-44.
34. Kong VY, Van der Linde S, Aldous C, Handley JJ, Clarke DL. Quantifying the disparity in outcome between urban and rural patients with acute appendicitis in South Africa. *S Afr Med J* 2013;103:742-5.
35. Ladd MR, Pajewski NM, Becher RD, Swanson JM, Gallaher JR, Prankoff T, et al. Delays in treatment of pediatric appendicitis: a more accurate variable for measuring pediatric healthcare inequalities? *Am Surg* 2013;79:875-81.
36. Leeuwenburgh MM, Montpellier V, Vlamincx BJ, Go PM. *Streptococcus milleri* in intraabdominal abscesses in children after appendectomy: incidence and course. *J Pediatr Surg* 2012;47:535-9.
37. Levy SM, Holzmann-Pazgal G, Lally KP, Davis K, Kao LS, Tsao K. Quality check of a quality measure: surgical wound classification discrepancies impact risk-stratified surgical site infection rates in pediatric appendicitis. *J Am Coll Surg* 2013;217:969-73.
38. Mizrahi I, Mazeh H, Levy Y, Karavani G, Ghanem M, Armon Y, et al. Comparison of pediatric appendectomy outcomes between pediatric surgeons and general surgery residents. *J Surg Res* 2013;180:185-90.
39. Saito JM, Yan Y, Evashwick TW, Warner BW, Tarr PI. Use and accuracy of diagnostic imaging by hospital type in pediatric appendicitis. *Pediatrics* 2013;131:e37-44.
40. Schietroma M, Piccione F, Carlei F, Clementi M, Bianchi Z, de Vita F, et al. Peritonitis from perforated appendicitis: stress response after laparoscopic or open treatment. *Am Surg* 2012;78:582-90.
41. Chiang RA, Chen SL, Tsai YC. Delayed primary closure versus primary closure for wound management in perforated appendicitis: a prospective randomized controlled trial. *J Chin Med Assoc* 2012;75:156-9.
42. Kong VY, Bulajic B, Allorto NL, Handley J, Clarke DL. Acute appendicitis in a developing country. *World J Surg* 2012;36:2068-73.
43. Lacher M, Muensterer OJ, Yannam GR, Aprahamian CJ, Perger L, Megison M, et al. Feasibility of single-incision pediatric endosurgery for treatment of appendicitis in 415 children. *J Laparoendosc Adv Surg Tech A* 2012;22:604-8.
44. Khan KI, Mahmood S, Akmal M, Waqas A. Comparison of rate of surgical wound infection, length of hospital stay and patient convenience in complicated appendicitis between primary closure and delayed primary closure. *J Pak Med Assoc* 2012;62:596-8.
45. Broker ME, van Lieshout EM, van der Elst M, Stassen LP, Schepers T. Discriminating between simple and perforated appendicitis. *J Surg Res* 2012;176:79-83.
46. Hughes MJ, Harrison E, Paterson-Brown S. Post-operative antibiotics after appendectomy and post-operative abscess development: a retrospective analysis. *Surg Infect (Larchmt)* 2013;14:56-61.
47. Galli R, Banz V, Fenner H, Metzger J. Laparoscopic approach in perforated appendicitis: increased incidence of surgical site infection? *Surg Endosc* 2013;27:2928-33.
48. Groves LB, Ladd MR, Gallaher JR, Swanson J, Becher RD, Prankoff T, et al. Comparing the cost and outcomes of laparoscopic versus open appendectomy for perforated appendicitis in children. *Am Surg* 2013;79:861-4.
49. Hartwich JE, Carter RF, Wolfe L, Goretsky M, Heath K, St Peter SD, et al. The effects of irrigation on outcomes in cases of perforated appendicitis in children. *J Surg Res* 2013;180:222-5.
50. Knott EM, Gasior AC, Ostlie DJ, Holcomb GW 3rd, St Peter SD. Decreased resource utilization since initiation of institutional clinical pathway for care of children with perforated appendicitis. *J Pediatr Surg* 2013;48:1395-8.
51. Safavi A, Langer M, Skarsgard ED. Endoloop versus endostapler closure of the appendiceal stump in pediatric laparoscopic appendectomy. *Can J Surg* 2012;55:37-40.
52. St Peter SD, Adibe OO, Iqbal CW, Fike FB, Sharp SW, Juang D, et al. Irrigation versus suction alone during laparoscopic appendectomy for perforated appendicitis: a prospective randomized trial. *Ann Surg* 2012;256:581-5.
53. Fallon SC, Hassan SF, Larimer EL, Rodriguez JR, Brandt ML, Wesson DE, et al. Modification of an evidence-based protocol for advanced appendicitis in children. *J Surg Res* 2013;185:273-7.
54. Ali N, Aliyu S. Appendicitis and its surgical management experience at the University of Maiduguri Teaching Hospital Nigeria. *Niger J Med* 2012;21:223-6.

55. Dennett KV, Tracy S, Fisher S, Charron G, Zurakowski D, Calvert CE, et al. Treatment of perforated appendicitis in children: what is the cost? *J Pediatr Surg* 2012;47:1177-84.
56. Hung MH, Lin LH, Chen DF. Clinical manifestations in children with ruptured appendicitis. *Pediatr Emerg Care* 2012;28:433-5.
57. Yannam GR, Griffin R, Anderson SA, Beierle EA, Chen MK, Harmon CM. Single incision pediatric endosurgery (SIPES) appendectomy-is obesity a contraindication? *J Pediatr Surg* 2013;48:1399-404.
58. Yilmaz M, Akbulut S, Kutluturk K, Sahin N, Arabaci E, Ara C, et al. Unusual histopathological findings in appendectomy specimens from patients with suspected acute appendicitis. *World J Gastroenterol* 2013;19:4015-22.
59. Teixeira PG, Sivrikoz E, Inaba K, Talving P, Lam L, Demetriades D. Appendectomy timing: waiting until the next morning increases the risk of surgical site infections. *Ann Surg* 2012;256:538-43.
60. Wilson DG, Bond AK, Ladwa N, Sajid MS, Baig MK, Sains P. Intra-abdominal collections following laparoscopic versus open appendectomy: an experience of 516 consecutive cases at a district general hospital. *Surg Endosc* 2013;27:2351-6.
61. Dimitriou I, Reckmann B, Nephuth O, Betzler M. Single institution's experience in laparoscopic appendectomy as a suitable therapy for complicated appendicitis. *Langenbecks Arch Surg* 2013;398:147-52.
62. Wei L, Macdonald TM, Shimi SM. Appendectomy is associated with increased pregnancy rate: a cohort study. *Ann Surg* 2012;256:1039-44.
63. McGowan DR, Sims HM, Zia K, Uheba M, Shaikh IA. The value of biochemical markers in predicting a perforation in acute appendicitis. *ANZ J Surg* 2013;83:79-83.
64. Naiditch JA, Lautz TB, Daley S, Pierce MC, Reynolds M. The implications of missed opportunities to diagnose appendicitis in children. *Acad Emerg Med* 2013;20:592-6.
65. Pooler BD, Lawrence EM, Pickhardt PJ. MDCT for suspected appendicitis in the elderly: diagnostic performance and patient outcome. *Emerg Radiol* 2012;19:27-33.
66. Dhupar R, Evankovich J, Ochoa JB, Vargas LG, Hughes SJ. Outcomes of operative management of appendicitis. *Surg Infect (Larchmt)* 2012;13:141-6.
67. Bansal S, Banever GT, Karrer FM, Partrick DA. Appendicitis in children less than 5 years old: influence of age on presentation and outcome. *Am J Surg* 2012;204:1031-5.
68. Tsai CC, Lee SY, Huang FC. Laparoscopic versus open appendectomy in the management of all stages of acute appendicitis in children: a retrospective study. *Pediatr Neonatol* 2012;53:289-94.
69. Hansson J, Korner U, Ludwigs K, Johnsson E, Jonsson C, Lundholm K. Antibiotics as first-line therapy for acute appendicitis: evidence for a change in clinical practice. *World J Surg* 2012;36:2028-36.
70. Azok JT, Kim DH, Munoz Del Rio A, Sonavane SK, Bhalla S, Anaya-Baez V, et al. Intraluminal air within an obstructed appendix: a CT sign of perforated or necrotic appendicitis. *Acad Radiol* 2012;19:1175-80.
71. Nomura O, Ishiguro A, Maekawa T, Nagai A, Kuroda T, Sakai H. Antibiotic administration can be an independent risk factor for therapeutic delay of pediatric acute appendicitis. *Pediatr Emerg Care* 2012;28:792-5.
72. Akkoyun I, Tuna AT. Advantages of abandoning abdominal cavity irrigation and drainage in operations performed on children with perforated appendicitis. *J Pediatr Surg* 2012;47:1886-90.
73. Vahdad MR, Troebs RB, Nissen M, Burkhardt LB, Hardwig S, Cernaianu G. Laparoscopic appendectomy for perforated appendicitis in children has complication rates comparable with those of open appendectomy. *J Pediatr Surg* 2013;48:555-61.
74. Nataraja RM, Teague WJ, Galea J, Moore L, Haddad MJ, Tsang T, et al. Comparison of intraabdominal abscess formation after laparoscopic and open appendectomies in children. *J Pediatr Surg* 2012;47:317-21.
75. St Peter SD, Sharp SW, Holcomb GW 3rd, Ostlie DJ. An evidence-based definition for perforated appendicitis derived from a prospective randomized trial. *J Pediatr Surg* 2008;43:2242-5.
